# Supplementary material for: Ubiquitin and SUMO conjugation as biomarkers of acute myeloid leukemias response to chemotherapies
Source: Life Sci Alliance. 2020 Apr 17;3(6):e201900577. doi: 10.26508/lsa.201900577 (PMC7167290; doi:10.26508/lsa.201900577)
Supplement: Supplementary file 5 [file LSA-2019-00577_TableS5.xlsx]

## Sheet: Patients Figure 3
Table S5. Clinical data associated with all patient samples used in this study. In addition to cytogenetic characteristics and treatment, the percentage of blasts is given at diagnosis and after 30 d. Patients with less than 10% of leukemic blasts after 30 d of treatment were considered as responsive to treatment and the others as refractory. The prognosis according to the ENL classification is g…
ID	Gender	Age at diagnosis	FAB	Blasts at diagnosis in bone marrow	Treatment	Blasts 30 days after diagnosis in bone marrow	Karyotype	FISH / Molecular biology	ELN 2017 prognosis
16127	M	59	AML 1	0.95	Idarubicine 5 Cytarabine 7	0.01	46,XY	FLT3 internal tandem duplication (allelic ratio : 0.6)	Adverse
17195	M	66	AML 1	0.79	Idarubicine 5 Cytarabine 7 Lomustine	0.01	46,XY	Biallelic mutated CEBPA	Good
16125	M	20	AML 1	0.92	Idarubicine 5 Cytarabine 7	0.75	46,XY,der(7)t(7;?)(p15;?),t(10;11)(p13;q21)[11]/46,idem,del(20)(q11.2)[6]	Deletion 5q	Adverse
16126	M	50	AML 1	0.86	Idarubicine 5 Cytarabine 7	0.88	46,XY,t(1;3)(p36;q21)[20]	FLT3 internal tandem duplication (allelic ratio : 0.4) RUNX1 deletion ?	Intermediate

## Sheet: Patients Figure 5
ID	Gender	Age at diagnosis	Blast percentage at diagnosis in bone marrow	Induction treatment	Blast percentage 30 days after diagnosis in bone marrow	Karyotype	FISH / Molecular biology	ELN 2017 prognosis
13005	F	64	0.56	Idarubicin 5 Cytarabine 7	0	46,XX[20]	/	Intermediate
15083	M	65	0.6	Idarubicin 5 Cytarabine 7 Lomustine	0	43,XY,del(4)(q21q35),-11,-14,-17,-20,+mar[10]/46,XY[17]	/	Adverse
15075	M	69	0.73	Idarubicin 5 Cytarabine 7 Lomustine	0.02	chr 22 trisomy	/	/
15085	F	41	0.78	Daunorubicin 3 Cytarabine 7	0.05	46,XX,t(11;19)(q23;p13.1)[15]	KMT2A rearrangement	Adverse
15088	F	45	0.72	Daunorubicin 3 Cytarabine 7	0.03	46,XX,t(12;20)(q24;q13)c[20]	Biallelic mutated CEBPA	Good
15096	M	25	0.88	Idarubicin 5 Cytarabine 7	0.01	46,XY,t(11;22)(q23;q11.2)[20]	KMT2A rearrangement	Adverse
15101	M	67	0.84	Idarubicin 5 Cytarabine 7 Lomustine	0.01	42-43,X,-Y,add(1)(p36),del(4)(q22),del(5)(q12q31),del(7)(p13), add(7)(p22),i(11)(q10),-11,add(12)(p13),add(13)(q34),add(15)(p13), add(16)(q24),-17,-19,+mar[cp9]	/	Adverse
15105	F	34	0.52	Daunorubicin 3 Cytarabine 7	0.03	46,XX,inv(16)(p13q22)[14]/46,XX[2]	CBFB-MYH11 rearrangement	Good
16127	M	59	0.95	Idarubicin 5 Cytarabine 7	0.01	46,XY[20]	FLT3 internal tandem duplication (allelic ratio : 0.6)	Adverse
16137	M	63	0.62	Idarubicin 5 Cytarabine 7 Lomustine	0.02	46,XY[20]	NPM1 mutation	Good
16140	M	59	0.78	Idarubicine 5 Cytarabine 7	0	46,XY[20]	NPM1 mutation	Good
16155	M	71	0.88	Idarubicin 5 Cytarabine 7 Lomustine	0.02	46,XY[20]	NPM1 mutation	Good
16185	F	69	0.68	Idarubicin 5 Cytarabine 7 Lomustine	0.01	39, X,-X, der(5;13)(p10;q10),-7, del(9)(q21q33),-10,-12,-16,-17,-18,t(20;22)(q13;q12),dic(21;?)(p13;?),+mar[16]/39,idem,-der(6;13),+der(6;21)(p10;q10),+add(13)(p11),-dic(21;?)[2]/42-43,X,-X,-5,-7,del(9),+11,-17,-18,+21,-22,+mar[cp2]	/	Adverse
17195	M	66	0.85	Idarubicin 5 Cytarabine 7 Lomustine	0.01	46,XY[20]	Biallelic mutated CEBPA	Good
17244	M	29	0.53	Daunorubicin 3 Cytarabine 7 Dasatinib	0.03	46,XY,t(9;22)(q34;q11)[11]/45,sl,-3,-7,add(18)(q23),-22,+2mar[13]/46,sdl,+8 [1]	BCR-ABL rearrangement	Adverse
17262	M	42	0.5	Cytarabine 4 Gemtuzumab ozogamicin 3	0.02	46,XY,inv(16)(p13q22)[15]	CBFB-MYH11 rearrangement	Good
17275	M	52	0.83	Cytarabine 5 Gemtuzumab ozogamicin 3 Midostaurin	0.01	46,XY[20]	FLT3 internal tandem duplication (allelic ratio : 0.9) NPM1 mutation	Intermediate
18294	F	62	0.55	Idarubicin 5 Cytarabine 7	0.02	47,XX,+8,inv(16)(p13q22)[12]/46,XX[5]	CBFB-MYH11 rearrangement	Good
18295	M	35	0.55	Daunorubicin 3 Cytarabine 7 Dasatinib	0.01	49,XY,+6,t(8;12)(q13;p13),t(9;22)(q34;q11.2),+19,+der(22)t(9;22)(q34;q11.2)[8]	BCR-ABL rearrangement	Adverse
18304	M	51	0.88	Daunorubicin 3 Cytarabine 7 Midostaurin	0.01	47,XYYc[19]/46,XY[1]	FLT3 internal tandem duplication (allelic ratio : 10.6)	Adverse
18309	F	39	0.59	Idarubicin 5 Cytarabine 7	0	46,XX[20]	Biallelic mutated CEBPA	Good
18317	F	32	0.75	Daunorubicin 3 Cytarabine 7	0.01	46,XX,inv(16)(p13q22)[6]/46,XX[4]	CBFB-MYH11 rearrangement FLT3 tyrosine-kinase domain mutation	Good
19319	M	53	0.69	Daunorubicin 3 Cytarabine 7	0.01	46,XY,inv(16)(p13q22)[12]/46,XY[1]	CBFB-MYH11 rearrangement	Good
19324	M	58	0.95	Daunorubicin 3 Cytarabine 3 + 3	0.02	45,X,-Y,t(8;21)(q22;q22)[10]	RUNX1-RUNX1T1 rearrangement	Good
19330	M	54	0.89	Daunorubicin 3 Cytarabine 7 Midostaurin	0.01	46,XY,-18,+mar[6]/46,XY[9]	FLT3 internal tandem duplication (allelic ratio : 0.85) NPM1 mutation	Intermediate
19332	M	63	0.43	Daunorubicin 3 Cytarabine 7	0	45,XY,-7[4]/46,XY[6]	/	Adverse
19338	F	62	0.32	Idarubicin 5 Cytarabine 7 Lomustine	0.01	46,XX,del(9)(q13q34)[8]/46,XX[2]	/	Intermediate
13008	F	60	0.58	Idarubicin 5 Cytarabine 7	0.11	46,XX[20]	/	Intermediate
15082	F	72	0.56	Idarubicin 5 Cytarabine 7 Lomustine	0.24	49,XX,+8,+21,+22[10]/46,XX[15]	/	Adverse
15098	M	37	0.94	Daunorubicin 3 Cytarabine 7	0.75	46,XY,t(6;14)(q21;q32)[18]/47,idem,+4[2]	/	Intermediate
16125	M	20	0.92	Idarubicin 5 Cytarabine 7	0.88	46,XY,der(7)t(7;?)(p15;?),t(10;11)(p13;q21)[11]/46,idem,del(20)(q11.2)[6]	Deletion 5q	Adverse
16126	M	50	0.86	Idarubicin 5 Cytarabine 7	0.88	46,XY,t(1;3)(p36;q21)[20]	FLT3 internal tandem duplication (allelic ratio : 0.4) RUNX1 deletion ?	Intermediate
17202	F	67	0.27	Idarubicin 5 Cytarabine 7 Lomustine	0.25	43,XX,-5,-7,-12,add(12)(p13),add(16)(q24),-17,+mar[8]/46,XX[12]	/	Adverse
17217	F	42	0.5	Idarubicin 5 Cytarabine 7	0.58	44,XX,inv(3)(?q12q25),-7,dic(7;12)(7q22->7p12::12p12->qter), der(16)t(16;17)(q12;q21),-17[15]/46,XX[1]	/	Adverse
18298	F	68	0.86	Idarubicin 5 Cytarabine 7 Lomustine	0.7	45,XX,-7,ins(11;3)(q21;q21q26)[8]	MECOM rearrangement	Adverse
19329	F	47	0.41	Daunorubicin 3 Cytarabine 7	0.53	46,XX,t(3;3)(q21;q26)[16]/46,XX[4]	MECOM rearrangement	Adverse
19334	F	52	0.68	Daunorubicin 3 Cytarabine 7 Midostaurin	0.32	46,XX[20]	FLT3 internal tandem duplication (allelic ratio : 0,74)	Adverse
